# Supplementary material
Source: publisher figshare collection journal article supplement (https://acs.figshare.com/ndownloader/files/4493014)
Supplement: Supplementary file 1 [file 4493014]

# Supporting Information

for

## Photoluminescent Silica Nanotubes and Nanodisks

## Prepared by the Reverse Micelle Sol-Gel Method

*Subhasree Banerjee, Anindya Datta\**

Department of Chemistry, Indian Institute of Technology Bombay, Powai,

Mumbai 400 076, India

---

\* Author for correspondence.

e-mail: [anindya@chem.iitb.ac.in](mailto:anindya@chem.iitb.ac.in), Phone: +91 22 2576 7149, Fax: +91 22 2572 3480

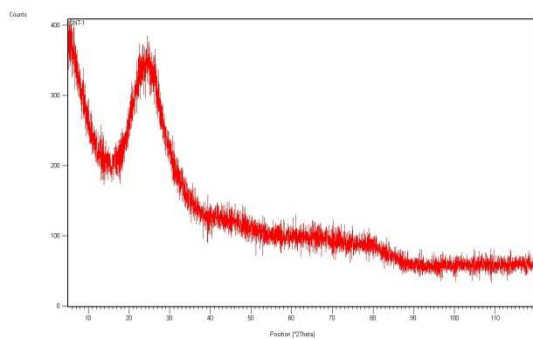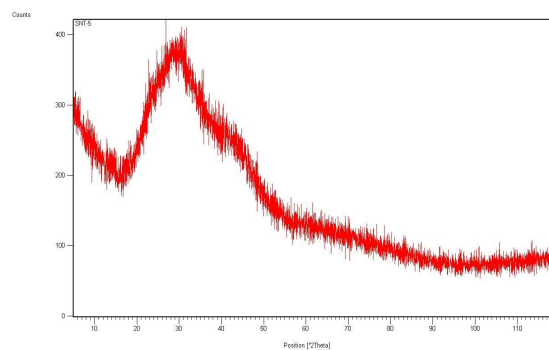

**(A)** **(B)**  
**Figure S1.** X-ray diffraction (XRD) spectrum of (A) silica nanodisk prepared at  $Wo = 22$  and (B) silica nanotubes prepared at  $Wo = 2$ .

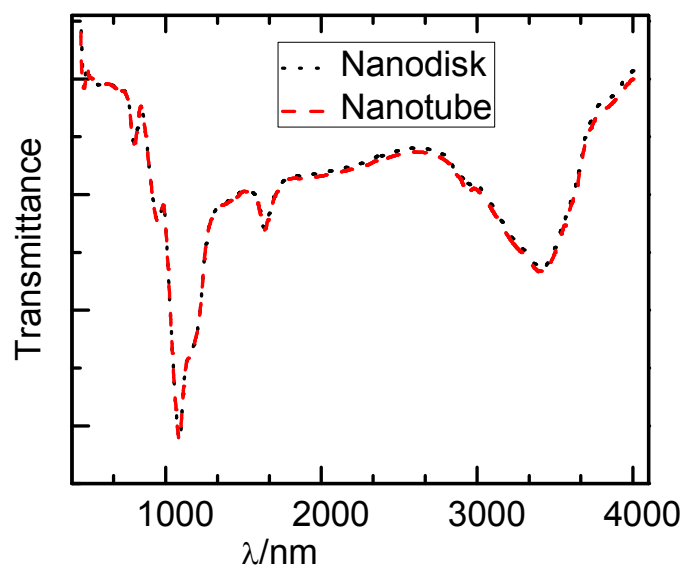

**Figure S2.** Infrared spectra of (A) silica nanodisk prepared at  $Wo = 22$  and (B) silica nanotubes prepared at  $Wo = 2$ .

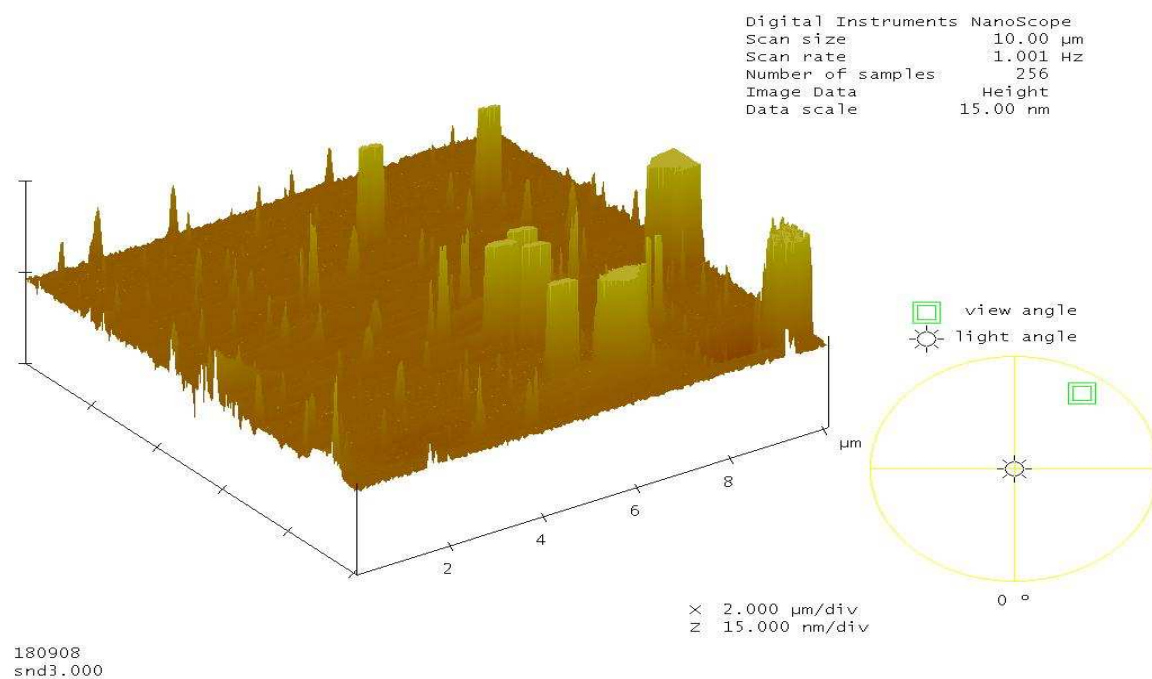

(A)

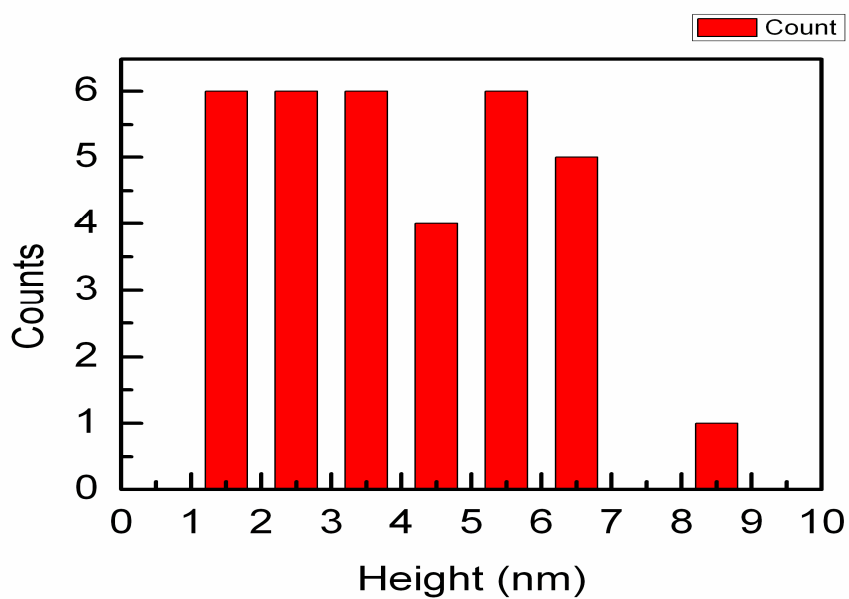

(B)

**Figure S3.**(A) Three dimensional AFM image, (B) height distribution graph of the nanodisk prepared at  $w_0=22$  solution.

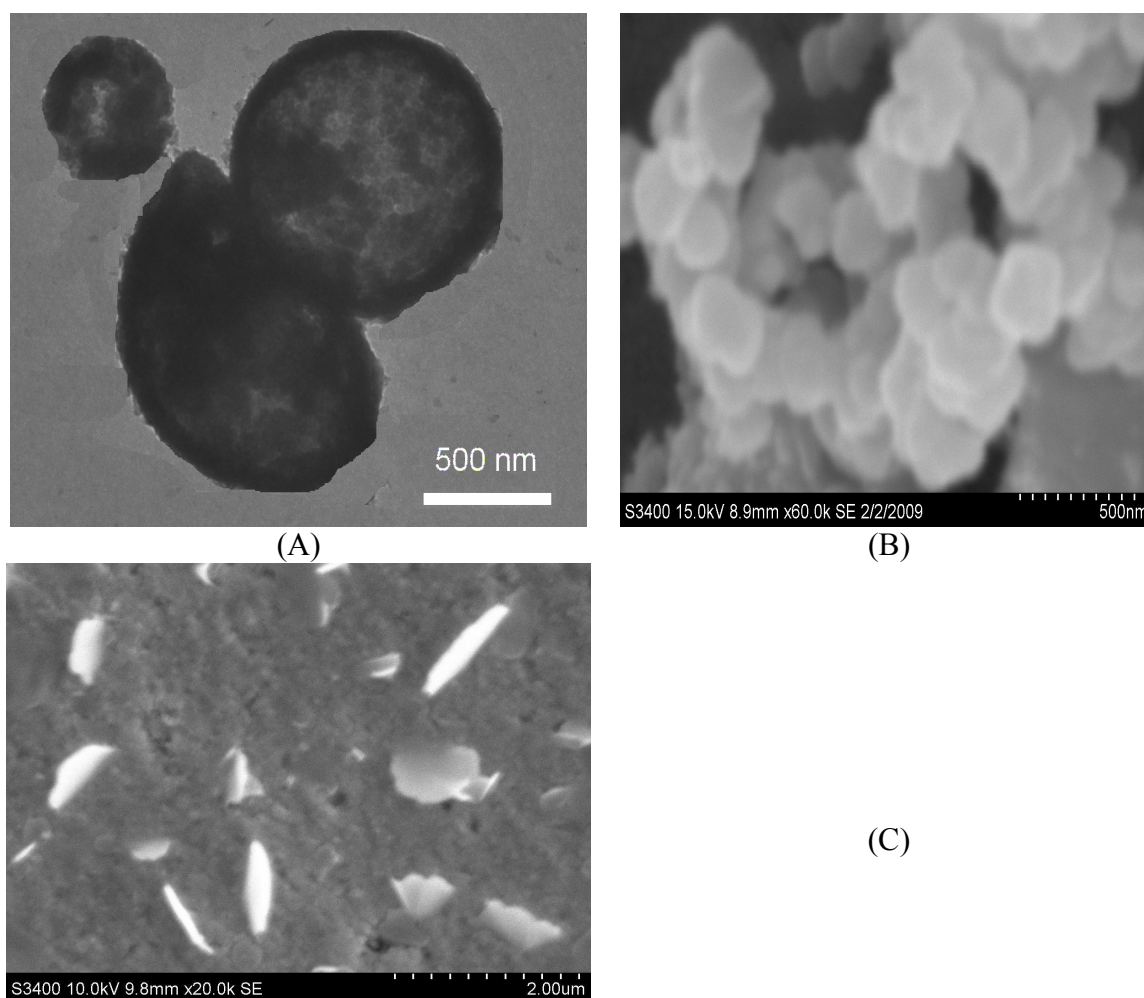

**Figure S4.** Effect of variation of  $w_0$  values: Transmission electron micrograph of silica nanodisk prepared in (A)  $w_0=40$  miemulsion; Scanning electron micrographs of silica nanodisk prepared in (B)  $w_0=40$  miemulsion. (C) SEM images of the nanodisks at a higher dilution of the solution used to prepare the sample.

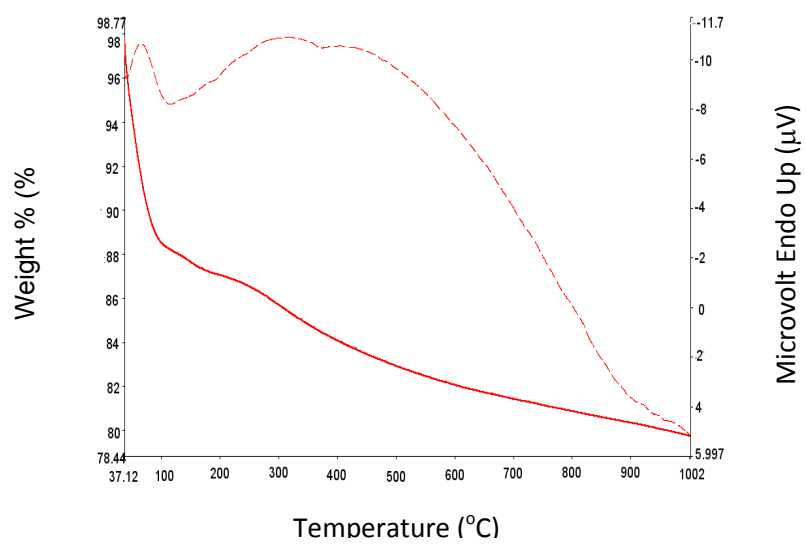

(A)

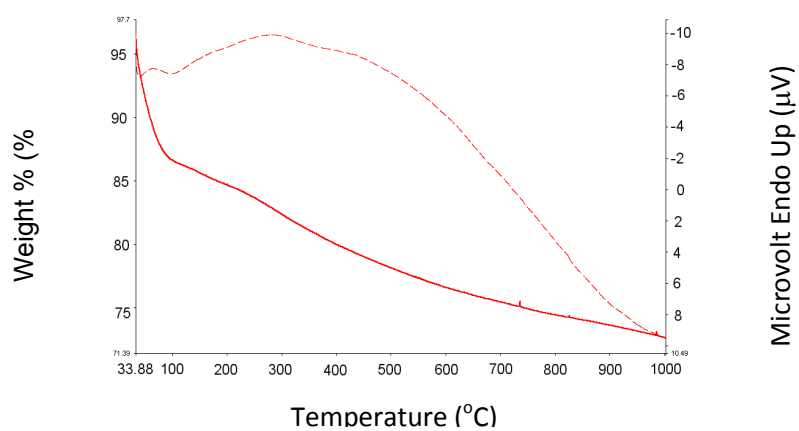

(B)

**Figure S5.** Thermogravimetric (solid line) and differential thermal analysis (dotted line) data for (A) silica nanodisks prepared in  $W_0 = 22$ ; (B) silica nanotubes prepared  $W_0 = 2$  solutions.

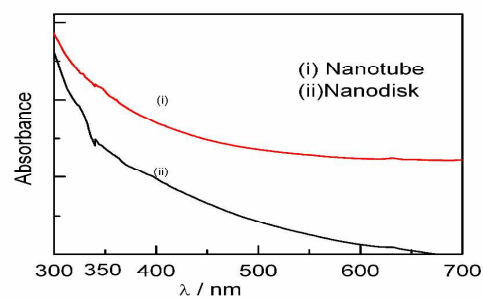

(A)

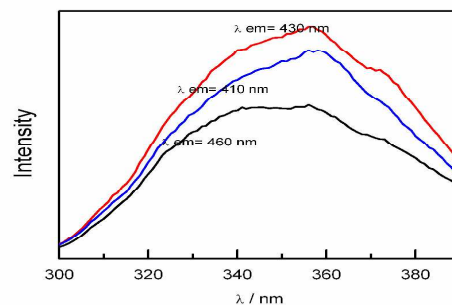

(B)

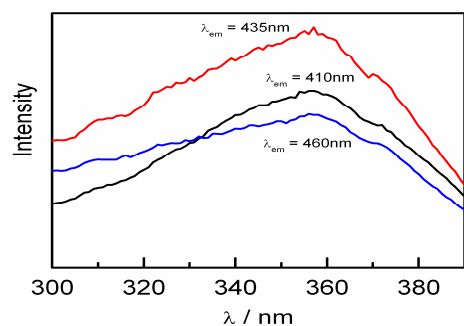

(C)

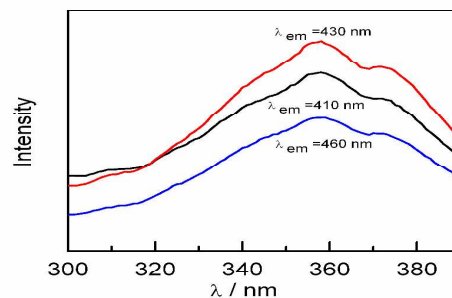

(D)

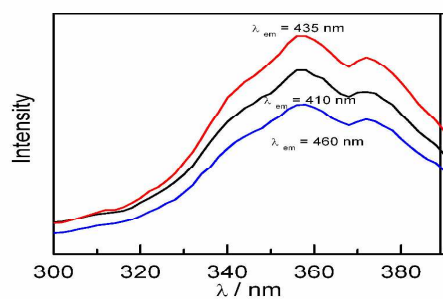

(E)

**Figure S6.** (A) Absorption spectra of the ethanolic dispersion of silica nanostructures; Excitation spectra of silica nanodisk prepared at  $w_0=22$  solution (B) after heating and (D) after nitrogen purging; Excitation spectra of silica nanodisk prepared at  $w_0=2$  solution (C) after heating and (E) after nitrogen purging.

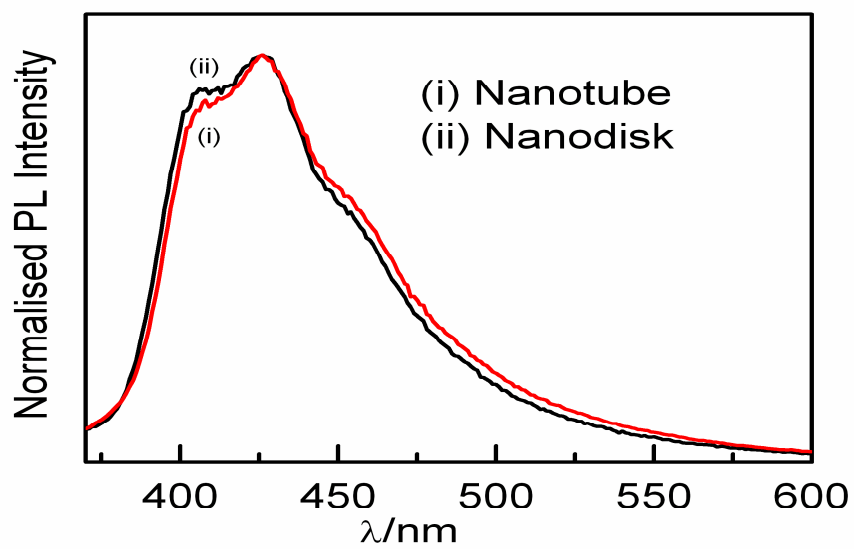

**Figure S7.** Normalised PL intensity of silica nanotubes and nanodisks dispersed in ethanol after annealing at 100°C.  $\lambda_{\text{ex}} = 350 \text{ nm}$



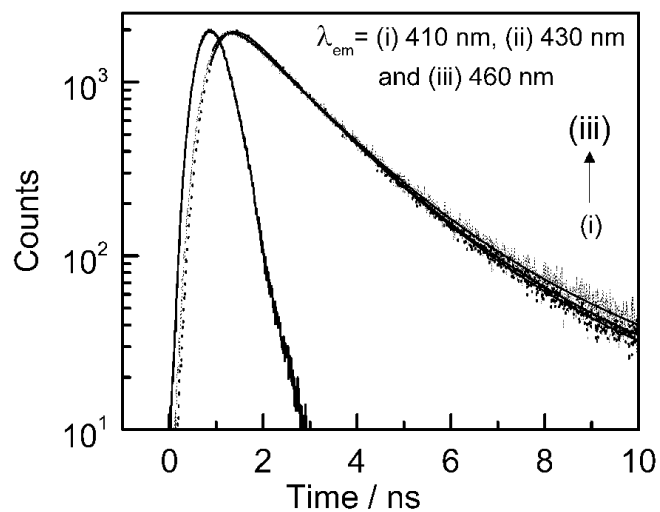

**Figure S8.** PL decays of the ethanolic dispersion of silica nanotubes prepared using reverse micelles of  $w_0 = 2$ , after nitrogen purging. The decays recorded at emission wavelengths of 410 nm, 430 nm and 460 nm are almost superimposable.

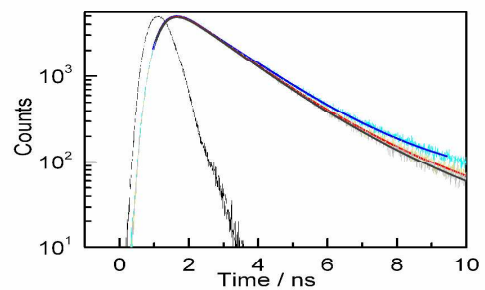

(A)

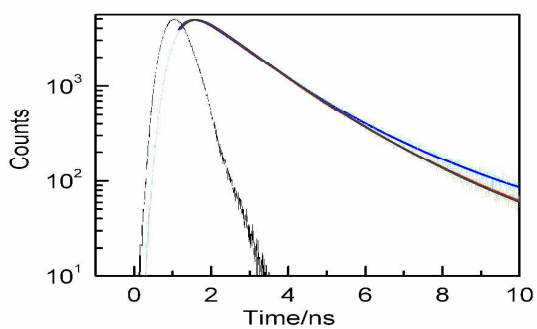

(B)

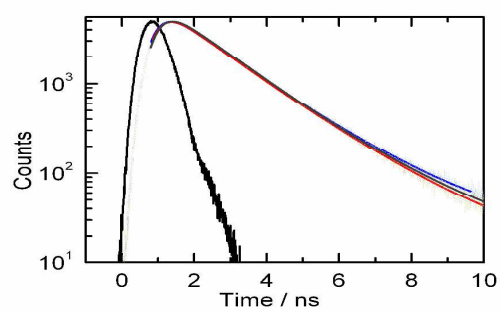

(C)

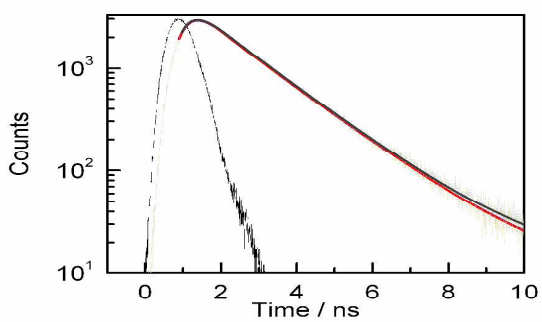

(D)

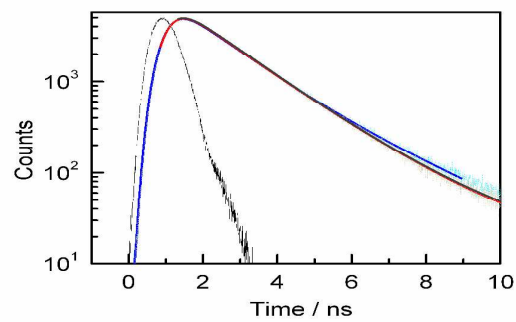

(E)

**Figure S9.** Time Resolved Photoluminescence of SNT (A) $w_0=3$ , (B) $w_0=4$ , (C) $w_0=10$ , (D) $w_0=22$ , (E) $w_0=40$  dispersed in Ethanol,  $\lambda_{ex} = 341$  nm.

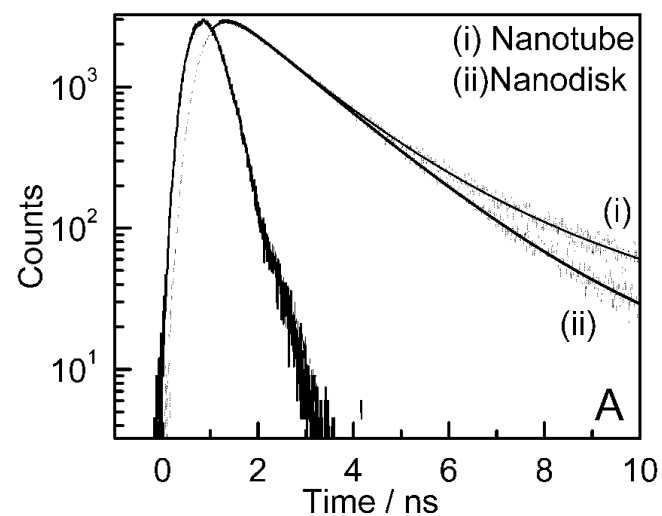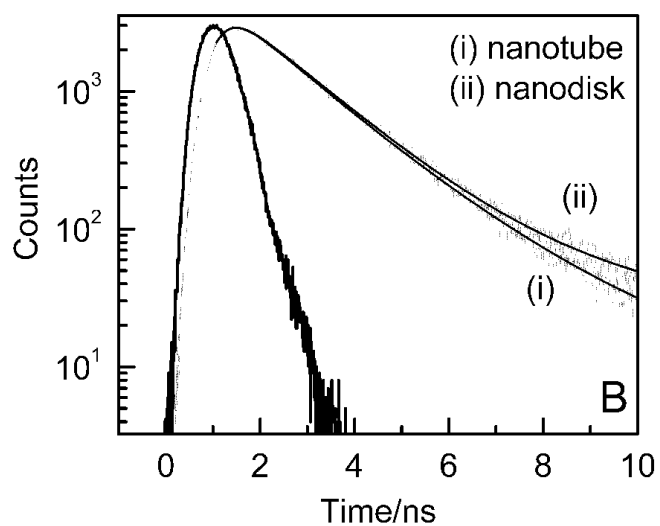

**Figure S10.** PL decays of the ethanolic dispersion of silica nanotubes (prepared from microemulsions  $w_0=2$ ) and nanodisks (prepared from microemulsions  $w_0=22$ ), after (A) nitrogen purging and (B) at oxygen purging.  $\lambda_{\text{ex}} = 341 \text{ nm}$ ,  $\lambda_{\text{em}} = 460 \text{ nm}$  in all cases.

**Table S1. Photoluminescence lifetimes and their amplitudes at  $\lambda_{\text{em}} = 410$  nm**

| <b>Sample</b><br><b>(<math>w_{\text{ow}}</math>)</b> | <b>A<sub>1</sub></b> | <b>T<sub>1</sub></b> | <b>A<sub>2</sub></b> | <b>T<sub>2</sub></b> | <b><math>\chi^2</math></b> |
|------------------------------------------------------|----------------------|----------------------|----------------------|----------------------|----------------------------|
| 3                                                    | 0.94                 | 1.55                 | 0.06                 | 2.99                 | 3                          |
| 4                                                    | 0.83                 | 1.21                 | 0.17                 | 2.52                 | 4                          |
| 10                                                   | 0.83                 | 1.33                 | 0.17                 | 2.49                 | 10                         |
| 22                                                   | 0.89                 | 1.43                 | 0.11                 | 2.25                 | 22                         |
| 40                                                   | 0.85                 | 1.33                 | 0.15                 | 2.49                 | 40                         |

**Table S2. Photoluminescence lifetimes and their amplitudes at  $\lambda_{\text{em}} = 430$  nm**

| <b>Sample</b><br><b>(<math>w_{\text{ow}}</math>)</b> | <b>A<sub>1</sub></b> | <b>T<sub>1</sub></b> | <b>A<sub>2</sub></b> | <b>T<sub>2</sub></b> | <b><math>\chi^2</math></b> |
|------------------------------------------------------|----------------------|----------------------|----------------------|----------------------|----------------------------|
| 3                                                    | 0.90                 | 1.40                 | 0.10                 | 2.99                 | 1.08                       |
| 4                                                    | 0.83                 | 1.26                 | 0.17                 | 2.52                 | 1.02                       |
| 10                                                   | 0.86                 | 1.38                 | 0.14                 | 2.36                 | 1.01                       |
| 22                                                   | 0.93                 | 1.50                 | 0.07                 | 2.47                 | 1.06                       |
| 40                                                   | 0.83                 | 1.39                 | 0.17                 | 2.20                 | 0.96                       |
